# Supplementary material for: Multimodal imaging of the receptor for advanced glycation end-products with molecularly targeted nanoparticles
Source: PubMed Central journal article supplement — Theranostics. 2018 Oct 5;8(18):5012–24. doi: 10.7150/thno.24791 (PMC6217059; doi:10.7150/thno.24791), 2018-10-05
Supplement: thnov08p5012s1.pdf [file thnov08p5012s1.pdf]

# Multimodal Imaging of the Receptor for Advanced Glycation End-products with Molecularly Targeted Nanoparticles

Christian J. Konopka<sup>1,2 \*</sup>, Marcin Wozniak<sup>3,4 \*</sup>, Jamila Hedhli<sup>1,2</sup>, Agata Ploska<sup>2,3,4</sup>, Aaron Schwartz-Duval<sup>1</sup>, Anna Siekierzycka<sup>3</sup>, Dipanjan Pan<sup>1,2</sup>, Gnanasekar Munirathinam<sup>5</sup>, Iwona T. Dobrucki<sup>2</sup>, Leszek Kalinowski<sup>3,4 #</sup>, Lawrence W. Dobrucki<sup>1,2,3,4 #</sup>

<sup>1</sup> Department of Bioengineering, University of Illinois at Urbana-Champaign, Urbana, IL

<sup>2</sup> Beckman Institute for Advanced Science and Technology, Urbana, IL

<sup>3</sup> Department of Medical Laboratory Diagnostics and Central Bank of Frozen Tissues & Genetic Specimens, Medical University of Gdansk, Gdansk, Poland

<sup>4</sup> Biobanking and Biomolecular Resources Research Infrastructure Poland (BBMRI.PL), Gdansk, Poland

<sup>5</sup> Department of Biomedical Sciences, University of Illinois College of Medicine, Rockford, IL

\* authors contributed equally to these studies

SUPPLEMENTAL INFORMATION

## CHEMICAL SYNTHESIS

### Chemicals

Human serum albumin (HSA, fraction V), ethylenediamine-core PAMAM G4 dendrimer, glyoxylic acid,  $\text{NaCNBH}_3$ , and anhydrous DMSO were purchased from Sigma-Aldrich (St. Louis, MO). Sulfosuccinimidyl (Sulfo-NHS) acetate and PEGylated bis(sulfosuccinimidyl)suberate ( $\text{Bis}(\text{NHS})\text{PEG}_5$ ) were purchased from Thermo Scientific (Waltham, MA). 2-(4-isothiocyanatobenzyl)-NOTA (p-SCN-Bn-NOTA) was purchased from Macrocyclics (Plano, TX). Rhodamine (NHS ester) was purchased from Lumiprobe (Hunt Valley, MA).

### Synthesis of G4-[Ac]<sub>32</sub>.

Five hundred milligrams of ethylene-diamine-core PAMAM generation 4 dendrimer were desiccated in a 100 mL round-bottom flask and subsequently dissolved in 100 mM sodium bicarbonate buffer (pH 9.0) to a final concentration of 10 mg/mL with magnetic stirring. To this dendrimer solution, 36 mol equiv of sulfosuccinimidyl acetate were added as a solid and allowed to dissolve. The pH of the reaction mixture was immediately adjusted to 8.5 with 1 N NaOH and the reaction was allowed to proceed for 2 h at 25 °C. The partially acetylated PAMAM (G4) product was purified by ultrafiltration with deionized water using 10K MWCO Amicon Ultra-15 filters (Millipore) and lyophilized to obtain a white crystalline solid (yield: 97%). The product (**Figure S1A**) was characterized by proton nuclear magnetic resonance ( $^1\text{H}$  NMR) spectroscopy ( $\text{D}_2\text{O}$ , 400 MHz);  $\delta$  = 1.91 (105H,  $\text{COCH}_3$ ), 2.28-2.42 (248H,  $\text{C-CH}_2\text{-CONH}$ ), 2.50-2.61 (124H,  $\text{N-CH}_2\text{CH}_2\text{NH}$ ), 2.68-2.80 (248H,  $\text{N-CH}_2\text{CH}_2\text{CO}$ ), 3.14-3.36 (318H,  $\text{CONH-CH}_2$ ). Extent of surface acetylation was determined according to the method of Majoros et al.<sup>3</sup>

### Synthesis of G4-[Ac]<sub>32</sub>-[NOTA]<sub>16</sub>.

Six hundred milligrams of G4-[Ac]<sub>32</sub> were added to a 100-mL round-bottom flask and subsequently dissolved in 100 mM sodium bicarbonate buffer (pH 9.0) to a final concentration of 10 mg/mL with magnetic stirring. To the dendrimer solution, 16 mol equiv of SCN-Bz-NOTA dissolved in anhydrous DMSO, were added. The pH of the reaction mixture was immediately adjusted to 8.5 with 1N NaOH, and the reaction proceeded for 18 hr at 25 °C in the absence of light. The product was purified by ultrafiltration with deionized water using 10K MWCO Amicon Ultra-15 filters (Millipore), lyophilized and stored at -80°C. The product (**Figure S1B**) was characterized by proton nuclear magnetic resonance ( $^1\text{H}$  NMR) spectroscopy ( $\text{D}_2\text{O}$ , 400 MHz).

### Synthesis of G4-[Ac]<sub>32</sub>-[NOTA]<sub>16</sub>-[Rho]<sub>8</sub>.

To render dendrimer nanoparticle multimodal, G4-[Ac]<sub>32</sub>-[NOTA]<sub>16</sub> was dissolved in 100 mM sodium bicarbonate buffer (pH 8.5) to a final concentration of 10 mg/mL with magnetic stirring and incubated with 8 mol equiv of rhodamine NHS ester for 1 hr at 25 °C in the absence of light. The product was purified by ultrafiltration with deionized water using 10K MWCO Amicon Ultra-15 filters (Millipore), lyophilized and stored in dark at -80°C. The product (**Figure S1C**) was characterized by proton nuclear magnetic resonance (1H NMR) spectroscopy (D<sub>2</sub>O, 400 MHz).

### Synthesis of G4-[Ac]<sub>32</sub>-[NOTA]<sub>16</sub>-[Rho]<sub>8</sub>-[PEG<sub>5</sub>-X]<sub>8</sub>.

First, HSA-CML or HSA alone (10 mg/mL) was dissolved in PBS (pH 7.4) and incubated with 20-fold excess of Bis(NHS)PEG<sub>5</sub> for 1 hr at 25 °C to crosslink PEG to N-terminus of HSA-CML or HSA alone. After the reaction was completed, the product was purified using 10K MWCO Amicon Ultra-15 filters (Millipore) and lyophilized. Next, G4-[Ac]<sub>32</sub>-[NOTA]<sub>16</sub>-[Rho]<sub>8</sub> was dissolved in 100 mM sodium bicarbonate buffer (pH 9.0) to a final concentration of 10 mg/mL with magnetic stirring. To the dendrimer solution, 8 mol equiv of NHS-PEG<sub>5</sub>-HSA-CML (for RAGE-targeted nanoparticle) or NHS-PEG<sub>5</sub>-HSA (for non-targeted control) was added and incubated for 1 hr at 25 °C. The final product was purified using 100K MWCO Amicon Ultra-15 filters (Millipore) and lyophilized.

### Chemical modification of HSA (synthesis of CML)

Carboxymethyllysine (CML) modified HSA was prepared as described previously.<sup>1</sup> Briefly, 100 mg/mL of HSA (87.3 mM lysine equivalents) was dissolved in 10 mL of 0.2 M sodium phosphate buffer (pH 7.8). After adding 87.3 mM glyoxylic acid and 261.9 mM NaCNBH<sub>3</sub>, the solution was stirred for 24 hr at 37 °C protected from light, followed by two-times dialysis against sodium phosphate buffer (10 mM, pH 7.0) and once against sodium chloride (100 mM). To prepare CML samples with different levels of modification (0 – 100%) of lysine groups, HSA solution (100 mg/mL) was incubated in the same way as described above except for various concentrations of glyoxylic acid and 3x molar excess of NaCNBH<sub>3</sub>. CML solutions were purified and concentrated using 10K MWCO Amicon Ultra-4 filters (Millipore) by centrifugation (4000 g for 40 min). Protein concentrations were determined by bicinchoninic acid (BCA) protein assay reagent (Thermo Scientific) using HSA standards. To confirm the amount of modified lysine residues we used 2,4,6-trinitrobenzenesulfonic acid (TNBS) and method published previously<sup>2</sup> to determine the difference in free amino groups between modified and unmodified protein preparations (**Figure S2**). For subsequent experiments, CML samples were lyophilized and stored at -80 °C.

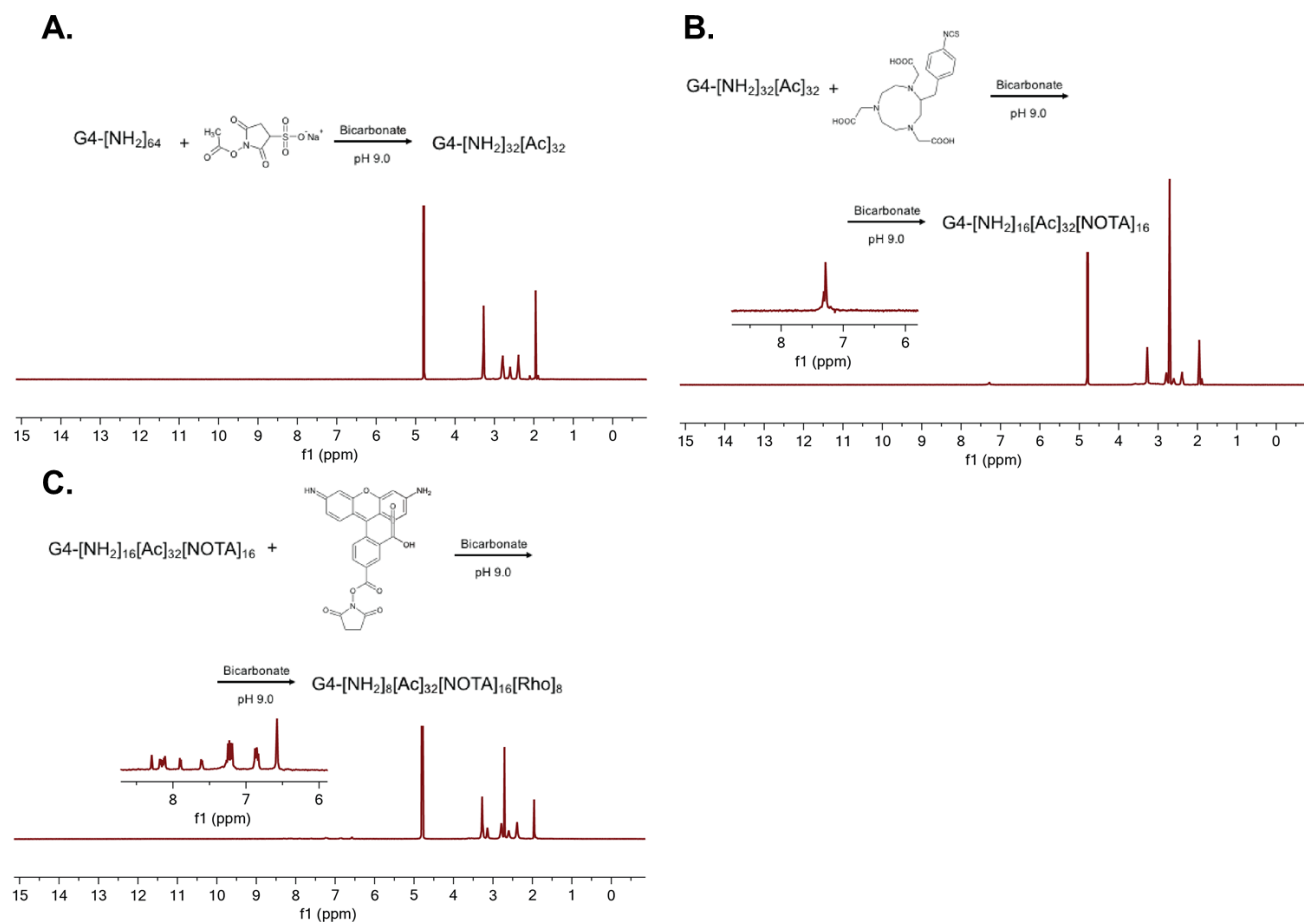

**Figure S1.** Schematic of the synthesis of multimodal RAGE-targeted G4-dendrimer nanoparticle with  $^1\text{H}$  NMR characterization of the synthetic route. The final step (not shown) involved targeting at RAGE by conjugating the well-characterized RAGE ligand, carboxymethyl-lysine (CML) modified human serum albumin (HSA) or HSA only (for non-targeted control nanoparticle) via  $\text{PEG}_5$  linker.  $^1\text{H}$  NMR spectra were acquired at 400 MHz for 20 mg/mL solutions of products from intermediate synthesis steps.

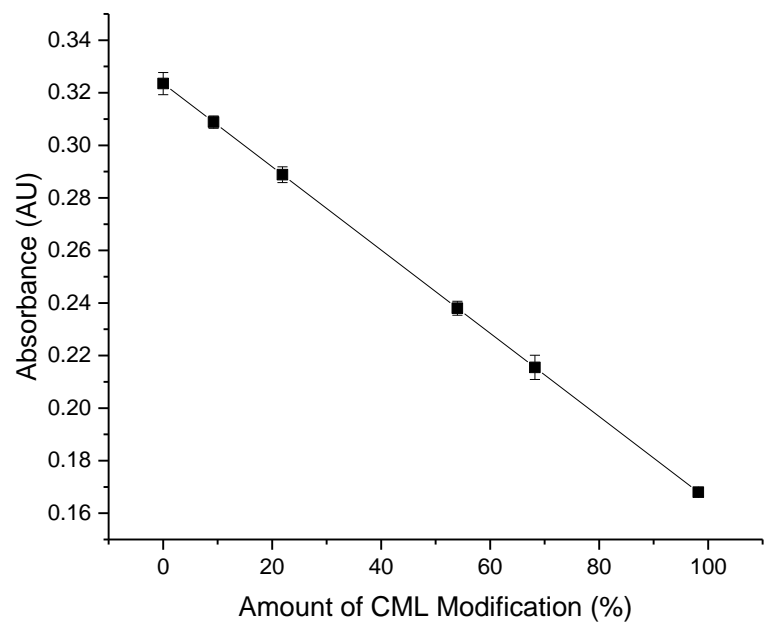

**Figure S2.** Absorbance readings detect amount free amine groups and confirm CML modification of HSA protein.

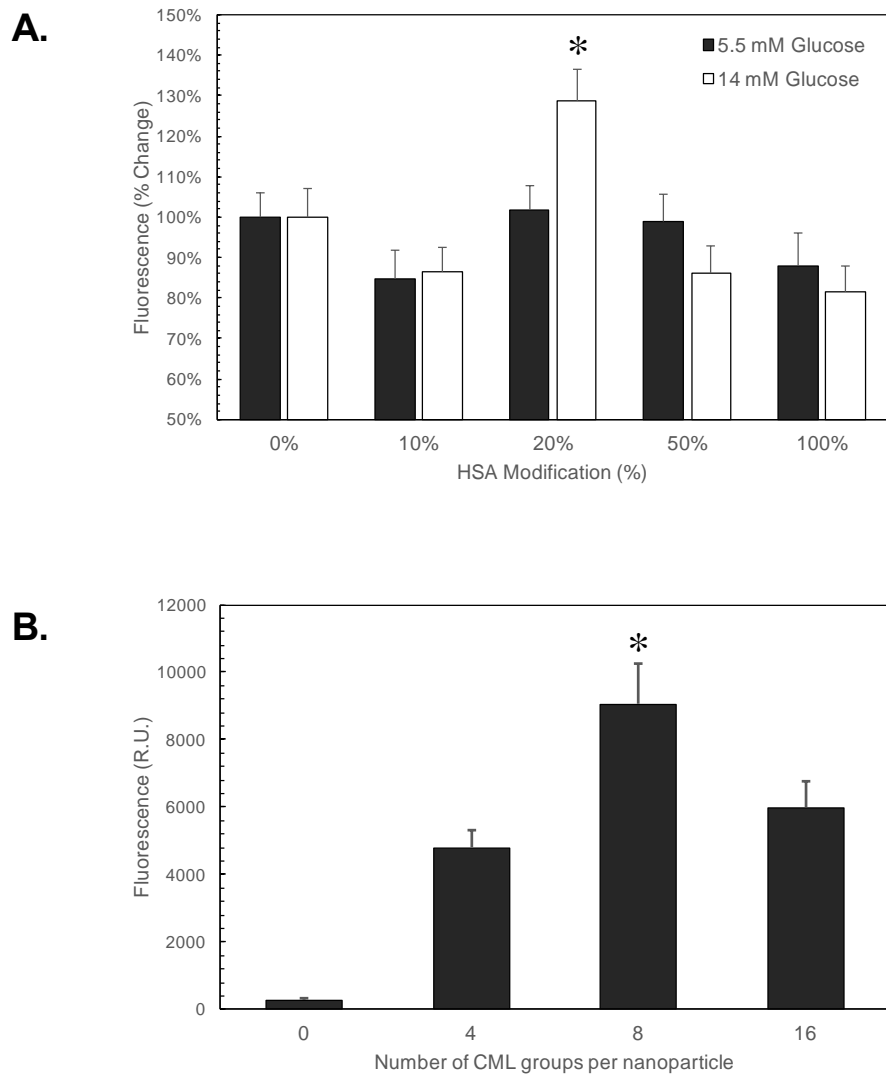

**Figure S3.** Optimization of G4-CML binding properties to HUVECs by varying the level of the modification of albumin lysine groups (A) and number of modified carboxy-methyl-lysine albumin molecules conjugated to G4 dendrimer (B).

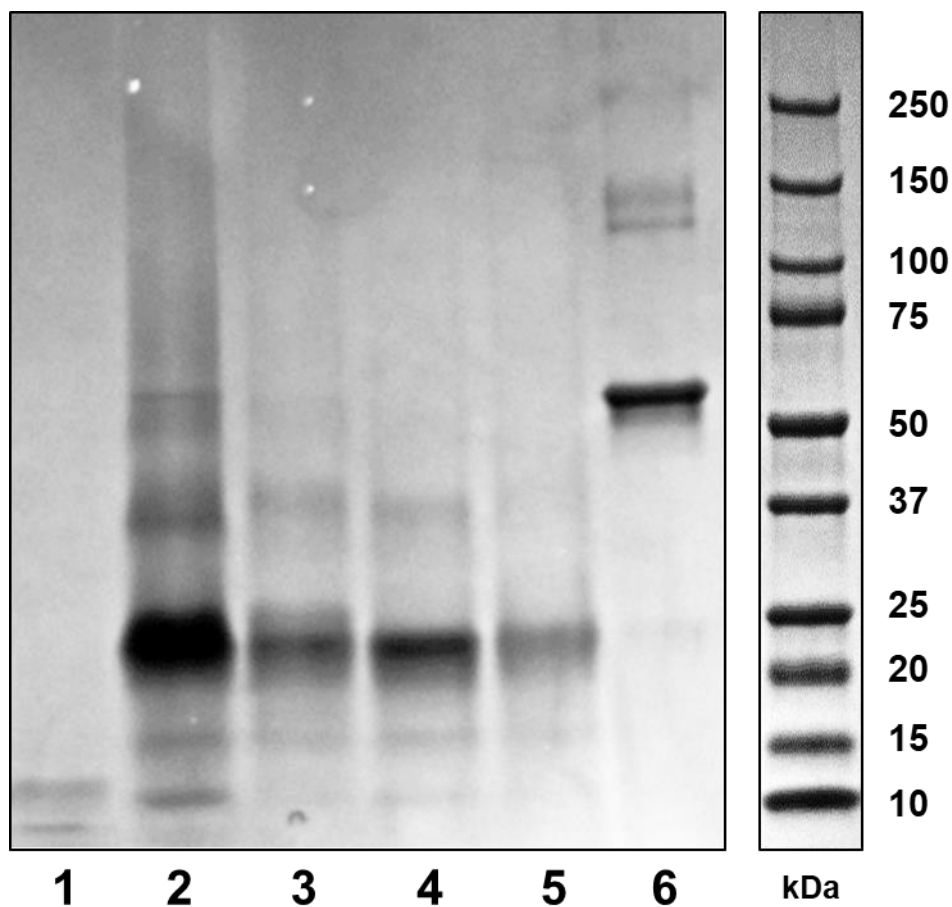

**Figure S4.** SDS-PAGE gel of the intermediate products of G4-Ac-NOTA-Rho-PEG<sub>4</sub>-CML synthesis. Lanes from left to right represents (1) G4 PAMAM dendrimer, (2) G4-Ac, (3) G4-Ac-NOTA, (4) G4-Ac-NOTA-Rho, (5) G4-Ac-NOTA-Rho-PEG<sub>4</sub> and the final product (6) G4-Ac-NOTA-Rho-PEG<sub>4</sub>-CML. Final construct (6) shows high molecular weight band (targeted nanoparticle construct) while a low molecular weight band near 53 kDa is due to unbound CML protein that was not filtered from the solution, but is prior to all experiments.

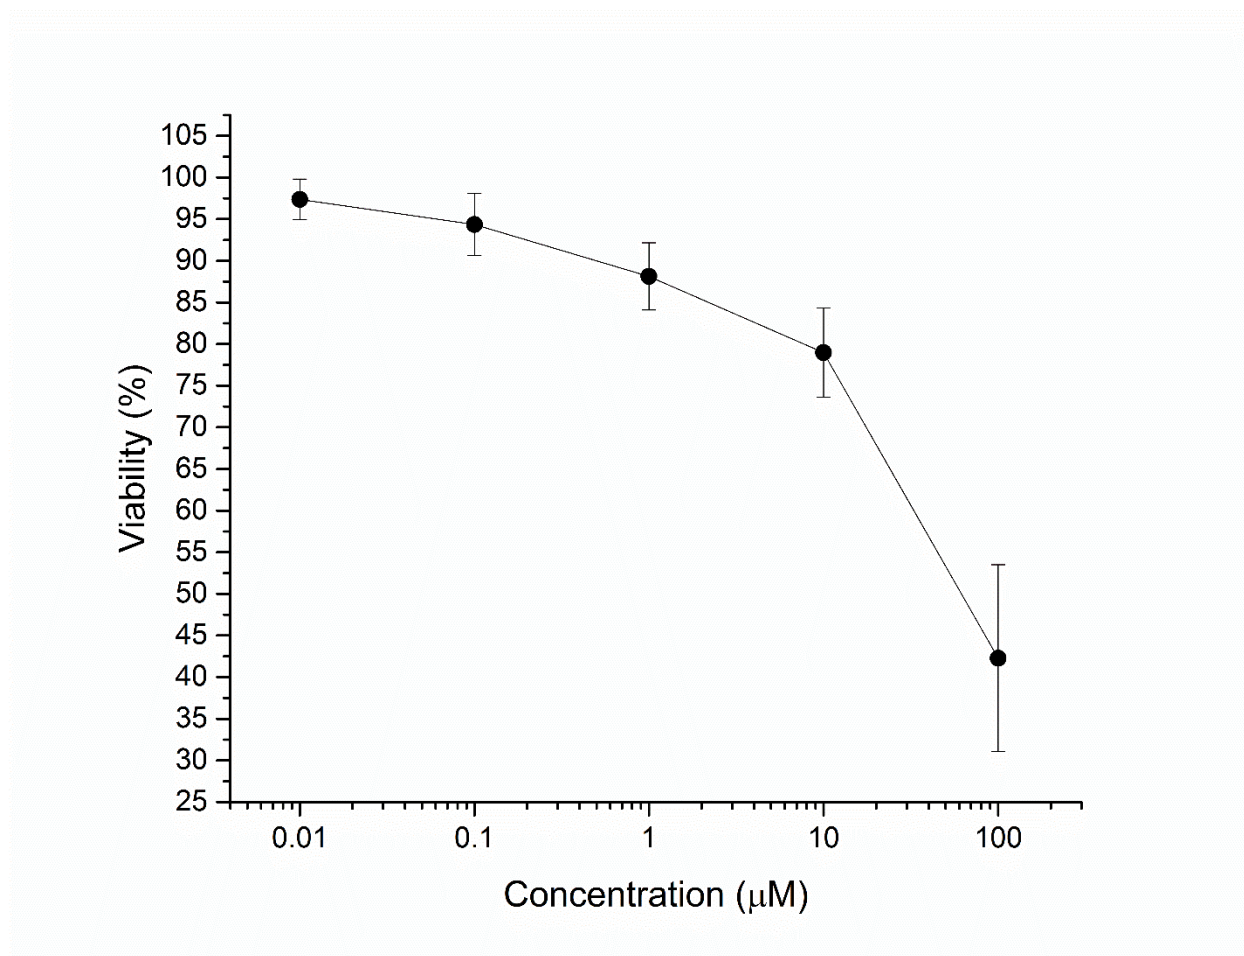

**Figure S5.** Trypan Blue viability assay to assess toxicity of G4-Ac-NOTA-Rho-PEG<sub>4</sub>-CML probe. Probe demonstrates noticeable toxicity between 10-100 μM (well above concentrations used for imaging or cell studies).

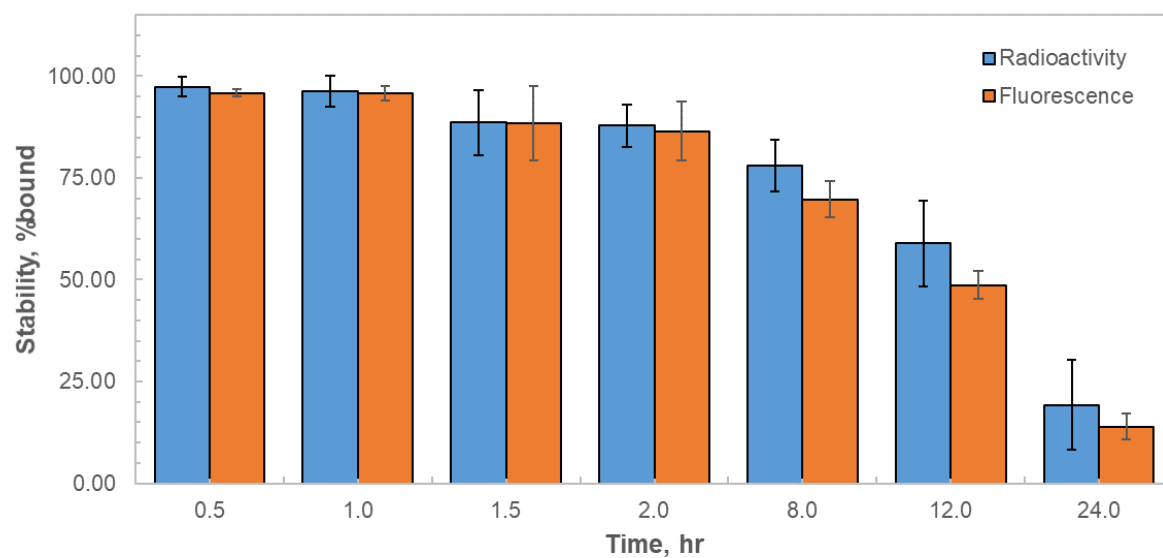

**Figure S6.** Stability of  $^{64}\text{Cu}$ -Rho-G4-CML was assessed by incubating probe in plasma.  $^{64}\text{Cu}$ -Rho-G4-CML remained stable through the imaging time-frame (1 hour) and remained constant up until ~12 hours, after which there was a significant decrease in stability.

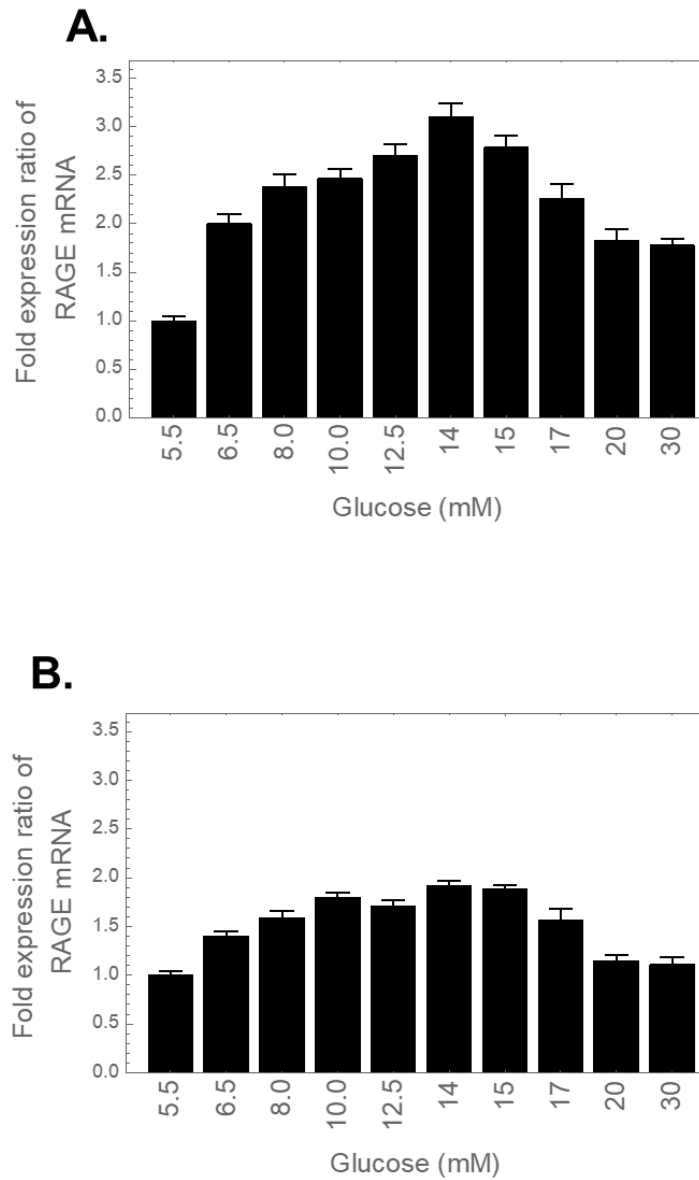

**Figure S7.** RAGE mRNA levels in HUVECs cultured in various glucose concentrations (5.5 mM – 30 mM) for the duration of 12 hours (A) and 24 hours (B). Incubation of HUVECs between 12-14 hours in diabetic-like environment with 14 mM glucose induced the highest RAGE mRNA levels.

## REFERENCES

- (1) Ikeda, K.; Higashi, T.; Sano, H.; Jinnouchi, Y.; Yoshida, M.; Araki, T.; Ueda, S.; Horiuchi, S. N (Epsilon)-(Carboxymethyl)lysine Protein Adduct Is a Major Immunological Epitope in Proteins Modified with Advanced Glycation End Products of the Maillard Reaction. *Biochemistry* **1996**, *35*, 8075–8083.
- (2) Habeeb, A. F. S. A. Determination of Free Amino Groups in Proteins by Trinitrobenzenesulfonic Acid. *Anal. Biochem.* **1966**, *14*, 328–336.
- (3) Majoros, I. J.; Keszler, B.; Woehler, S.; Bull, T.; Baker, J. R. Acetylation of Poly(amidoamine) Dendrimers. *Macromolecules* **2003**, *36*, 5526–5529.
